# Supplementary material for: Promotion of Psychological Well-Being and Life Satisfaction in Pre-Adolescents Through Mindfulness Amidst COVID-19
Source: Springer Nature journal article supplement (doi:10.1007/s12671-023-02269-3), 2023-12-01
Supplement: MOESM1 [file 26483828]

**Supplementary Information**

**Article title:** Promotion of psychological well-being and life satisfaction in pre-adolescents through mindfulness amidst COVID-19

**Journal name:** Mindfulness

**Table S1**

*Overview of the Mindfulness-Based Program*

|  | # | Summary | Activities |
| --- | --- | --- | --- |
| Module I: Intro | 1 | Participants were introduced to the program’s main goal, which was to experience happiness. Then, they were told that the most effective approach to achieve that goal was calming the mind through mindfulness. Additionally, participants made a commitment to engage in all activities together with ZiZu (i.e., the program’s mascot). | (1) Presentation of the program’s content and structure; (2) Movement meditation (target: arms); (3) Senses meditation (hearing); (4) Contents’ review Q&A game; and (5) Conclusion. |
| Module II: Senses | 2 | Participants gained knowledge about the significance of using their five senses (viz., touch, sight, hearing, smell, and taste) to focus on and appreciate the present moment. | (1) Breathing meditation (target: nose); (2) Revision of the previous lesson; (3) Eating meditation (target: all senses); (4) Game to observe the classroom mindfully; (5) Contents’ review Q&A game; and (6) Conclusion. |
| 3 | Participants were introduced to the skills of observing their surroundings through sight and hearing. Then, they performed several exercises to actively practice these skills. | (1) Breathing meditation (target: nose); (2) Revision of the previous lesson; (3) Senses meditation (target: sight); (4) Game to listen others mindfully; (5) Contents’ review Q&A game; and (6) Conclusion. |
| 4 | Participants engaged in practical exercises to enhance their focus of attention, specifically using their hearing and sight. Also, they participated in group discussions on how to effectively employ these senses in their everyday lives, at school or at home. | (1) Breathing meditation (target: chest); (2) Revision of the previous lesson; (3) Senses meditation (target: hearing); (4) Game to watch others mindfully; (5) Contents’ review Q&A game; and (6) Conclusion. |
| Module III: Body | 5 | Participants learned the importance of using their observation skills beyond the external environment to focus on their inner sensations. They were introduced to the three main inner targets that were going to be addressed, namely, the Body, Heart, and Brain (in Portuguese: Corpo, Coração, Cérebro, presented as the 3 C’s). | (1) Breathing meditation (target: chest); (2) Revision of the previous lesson; (3) Movement meditation (target: arms and head); (4) Body scan meditation; (5) Contents’ review Q&A game; and (6) Conclusion. |
| 6 | Participants engaged in discussions about the attributes of the body and its boundaries, along with the significance of observing them. Moreover, they actively participated in exercises to cultivate the skill of identifying various sensations in different body parts. | (1) Breathing meditation (target: stomach); (2) Revision of the previous lesson; (3) Movement meditation (target: whole body); (4) Game to imitate a partner’s body moves; (5) Contents’ review Q&A game; and (6) Conclusion. |
| 7 | Participants hone their ability to concentrate their attention in their bodies. Additionally, they acquired knowledge regarding the importance of conducting body scans to identify the emotional landscape by screening their hearts. | (1) Breathing meditation (target: stomach); (2) Revision of the previous lesson; (3) Body scan meditation; (4) Exploration of the body-feelings connection and then, the Game "Discover Feelings"; (5) Contents’ review Q&A game; and (6) Conclusion. |

|  | # | Summary | Activities |
| --- | --- | --- | --- |
| Module III: Heart | 8 | Participants actively engaged in exercises to develop their capacity for observing and understanding feelings by directing their attention to body sensations. They learned the weather metaphor, in which they associated feelings with weather states (e.g., happiness with the sun), to enhance their comprehension of how different emotions manifest in the body. | (1) Breathing meditation (target: nose, chest, and stomach); (2) Revision of the previous lesson; (3) Exploration of the weather metaphor; (4) Feelings meditation; (5) Contents’ review Q&A game; and (6) Conclusion. |
| 9 | Participants continued to practice the observation of their feelings. Moreover, they were introduced to the traffic light technique, which provided them with a practical tool to regulate their emotions, in particular, the most challenging ones, such as anger. | (1) Breathing meditation (target: nose, chest, and stomach); (2) Revision of the previous lesson; (3) Feelings meditation; (4) Emotional regulation practice (traffic light technique); (5) Contents’ review Q&A game; and (6) Conclusion. |
| 10 | Participants continued to practice the observation of their feelings. Furthermore, they were introduced to the importance of observing their brains to identify different types of thoughts, namely, those that are useful (e.g., *I can do it*) and those that are not (e.g., *I am stupid*). | (1) Breathing meditation (free focus); (2) Revision of the previous lesson; (3) Feelings meditation; (4) Introduction to useful and useless thoughts; (5) Contents’ review Q&A game; and (6) Conclusion. |
| Module IV: Brain | 11 | Participants actively participated in exercises focused on observing their thoughts. They explicitly trained the ability to discern between useful and not useful thoughts, and learned effective techniques to let go these latter. | (1) Breathing meditation (free focus); (2) Revision of the previous lesson; (3) Thoughts meditation; (4) Identification of useful and useless thoughts; (5) Contents’ review Q&A game; and (6) Conclusion. |
| 12 | Participants continued to practice the observation of their thoughts. In addition, they were introduced to the BE+ Game (Jogo SER+), a meditation that allowed them to observe the 3 C’s (Body, Heart, and Brain) every morning upon waking up. | (1) Breathing meditation (free focus, unguided); (2) Revision of the previous lesson; (3) Thoughts meditation; (4) Integrated body-mind meditation (target: body, feelings and thoughts); (5) Contents’ review Q&A game; and (6) Conclusion. |
| 13 | Participants acquired the knowledge and skills to employ the BE+ Game to observe the 3 C's (Body, Heart, and Brain) before going to bed. Additionally, they actively practiced the application of the traffic light technique to various everyday situations. | (1) Breathing meditation (unguided); (2) Revision of the previous lesson; (3) Integrated body-mind meditation; (4) Practice of the traffic light technique; (5) Contents’ review Q&A game; and (6) Conclusion. |
| Module V: Consolidation | 14 | Participants were introduced to the importance of displaying kindness towards others. They continued to practice the application of the traffic light technique. | (1) Integrated body-mind meditation; (2) Revision of the previous lesson; (3) Loving kindness meditation (target: others); (4) Practice of the traffic light technique; (5) Contents’ review Q&A game; and (6) Conclusion. |
| 15 | Participants learned the importance of showing kindness not only to others but also to themselves. They continued to practice the application of the traffic light technique. | (1) Integrated body-mind meditation; (2) Revision of the previous lesson; (3) Loving kindness meditation (target: others and self); (4) Practice of the traffic light technique; (5) Contents’ review Q&A game; and (6) Conclusion. |
| 16 | Participants listened to real-life examples that illustrated how to incorporate the learned and practiced meditation practices in their daily lives. After reflecting on the main learnings during the past 16 weeks, all participants received certificates for their efforts. | (1) Revision of the previous lesson; (2) Practical application of all meditations; and (3) Conclusion and delivery of certificates. |

**Table S2**

*Overview of the Socio-Emotional Program*

|  | # | Summary | Activities |
| --- | --- | --- | --- |
| Intro | 1 | Participants were provided with an overview of the program, including its main objectives and the types of activities involved. Moreover, they were encouraged to present themselves in dynamic activities, fostering enthusiasm and motivation for the program. | (1) Presentation of the program’s content and structure; (2) Self-Presentation by sharing preferences; (3) Alligator game; and (4) Conclusion. |
| Interpersonal skills | 2 | Participants were encouraged to engage in collaborative teamwork to foster essential skills, including cooperation, communication, and strategic planning. Individual accountability within the group was emphasized to promote self-awareness and personal growth. | (1) Revision of the previous lesson; (2) Game "The Amiba"; (3) Contents’ review Q&A game; and (4) Conclusion. |
| 3 | Participants were trained to become aware of the diversity of existing communication strategies and their advantages and disadvantages. They were also encouraged to develop adaptive communication styles and emotional expression. | (1) Revision of the previous lesson; (2) Presentation of communication styles; (3) Assertive training; (4) Contents’ review Q&A game; and (5) Conclusion. |
| 4 | Participants were encouraged to become aware of peer pressure. They learned how to distinguish between influences that benefit them and those that harm them. They were also taught skills to resist to peer pressure and use it in their advantage. | (1) Revision of the previous lesson; (2) Differentiating good and bad influences; (3) Techniques to deal with peer pressure; (4) Contents’ review Q&A game; and (5) Conclusion. |
| 5 | Participants were trained to identify bullying situations and to intervene as bystanders, actively and supportively. They were also asked to share bullying stories, which were used to strengthen their skills for resisting and stopping bullying. | (1) Revision of the previous lesson; (2) Bullying/Peer mistreatment; (3) Contents’ review Q&A game; and (4) Conclusion. |
| Decision-making | 6 | Participants were trained to become aware of the different levels of decision-making. They were also encouraged to develop decision-making skills through a systematic step-by-step approach: (1) identifying the situation, (2) generating potential options, (3) considering the likely consequences of each option, (4) acting with the optimal choice, and (5) evaluating the results of the decision. | (1) Revision of the previous lesson; (2) Easy and difficult decisions and how to make them; (3) Contents’ review Q&A game; and (4) Conclusion. |
| 7 | Participants were asked to analyze the values, beliefs, and prejudices underlying their choices. They were further encouraged to apply the step-by-step approach they had learned in the previous session when making difficult decisions. They discussed the importance of reaching agreement, even without consensus, and of making decisions while respecting others. | (1) Revision of the previous lesson; (2) How to make difficult decisions; (3) Contents’ review Q&A game; and (4) Conclusion. |
| Consolidation | 8 | Participants listened to real-life examples that illustrated how to incorporate the learned and practiced strategies in their daily lives. After reflecting on the main learnings during the past 8 weeks, all participants received certificates for their efforts. | (1) Revision of the previous lesson; (2) Practical application of all main contents; and (3) Conclusion and delivery of certificates. |
